# Supplementary material for: Chitosan Loaded into a Hydrogel Delivery System as a Strategy to Treat Vaginal Co-Infection
Source: Pharmaceutics. 2018 Feb 3;10(1):23. doi: 10.3390/pharmaceutics10010023 (PMC5874836; doi:10.3390/pharmaceutics10010023)
Supplement: Supplementary File 1 [file pharmaceutics-10-00023-s001.pdf]

# Supplementary Materials: Chitosan Loaded into a Hydrogel Delivery System as a Strategy to Treat Vaginal Co-Infection

Diego R. Perinelli, Raffaella Campana, Athanasios Skouras, Giulia Bonacucina, Marco Cespi, Francesca Mastrotto, Wally Baffone and Luca Casettari

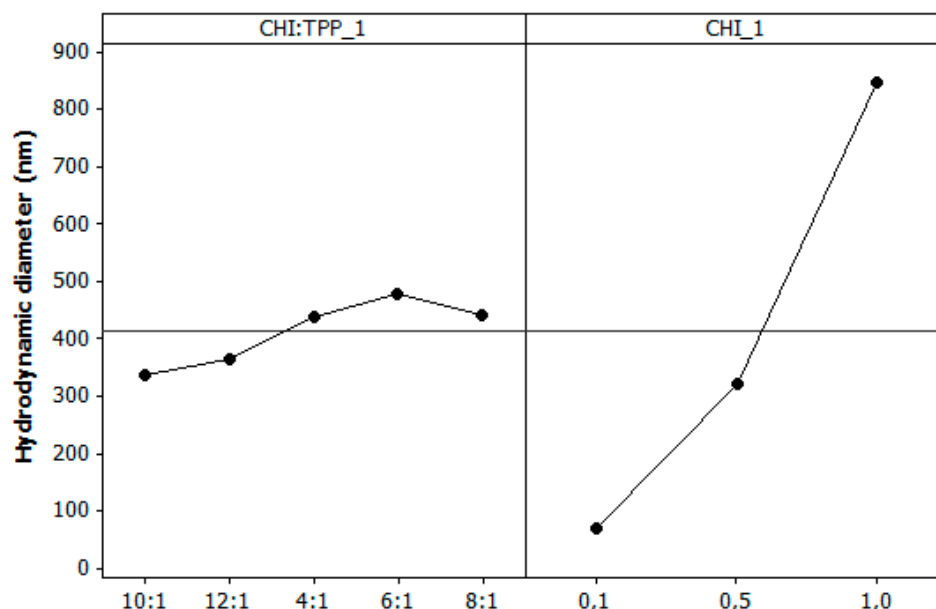

**Figure S1.** “Main effect” plot relative to the factors (CS % and CS/TPP ratio) influencing the size of nanoparticles.

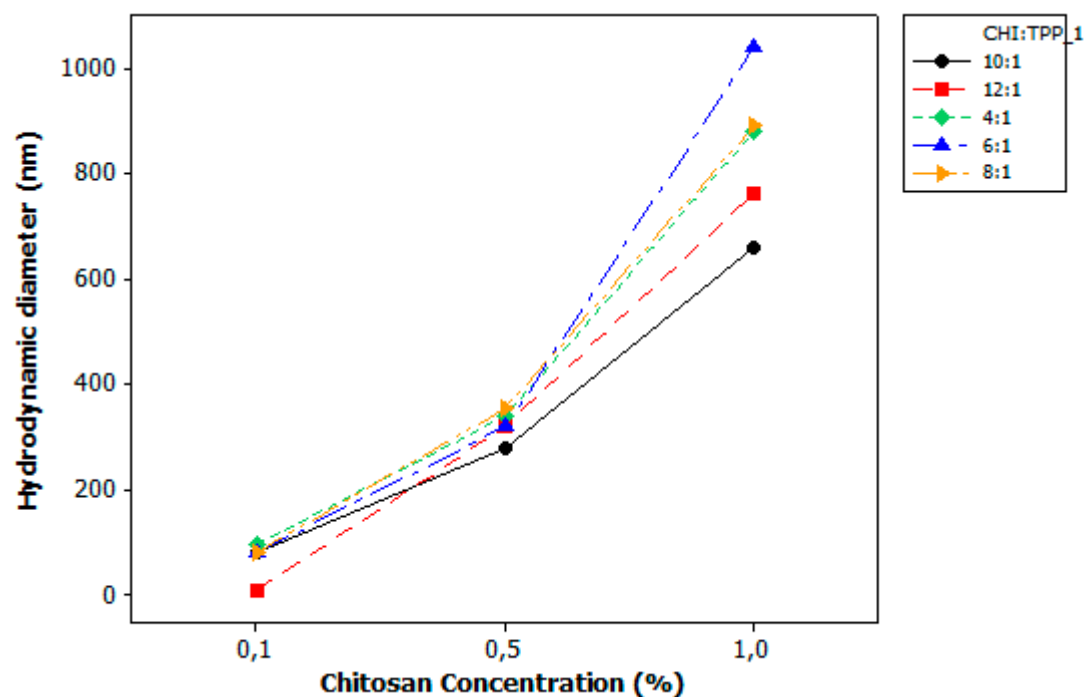

**Figure S2.** “Interactions plot” between the factors (CS % and CS/TPP ratio) influencing the size of nanoparticles.

## Characterization of CS nanoparticles Prepared in 200 mM Acetate Buffer pH 5 and pH 5.5

The pH value of the buffer used for the preparation of CS nanoparticles has a strong effect on nanoparticles size. By analysing CS nanoparticles prepared at the same concentration, a progressive rise of size occurred by increasing the pH from 4.5 to 5 and 5.5. For chitosan 0.1% *w/w* nanoparticles, size increased from approximately 90 nm at pH 4.5 to around 200 nm at pH 5 and 300-400 nm at pH 5.5. For 0.5% CS nanoparticles, size increased from 300 nm at pH 4.5 to around 400-500 nm at pH 5 and 600-700 nm at pH 5.5. 1% CS nanoparticles were obtained only at pH 4.5. By increasing the pH to 5 and 5.5, colloidal systems with a size above 1000 nm were produced.

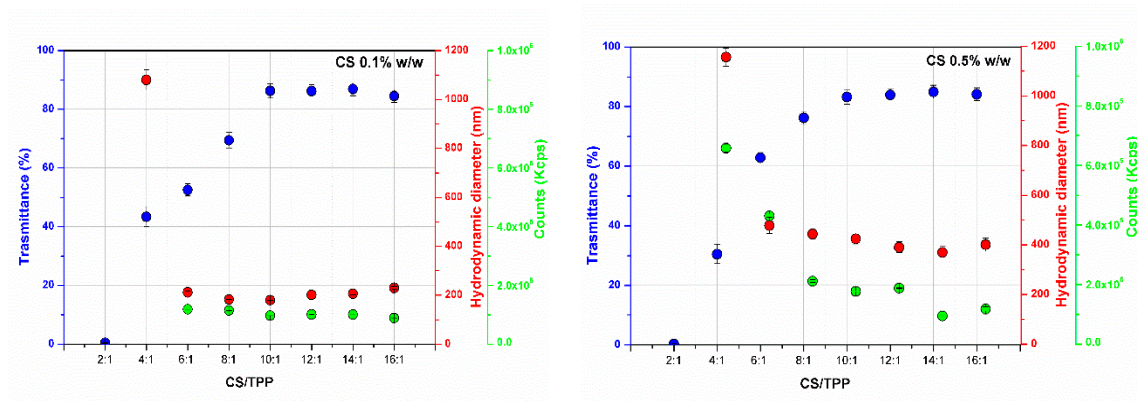

**Figure S3.** Hydrodynamic diameter (nm), counts (Kcps) and transmittance (%) of nanoparticles at different CS concentrations (0.1%, 0.5% and 1%; *w/w*) and different CS/TPP ratio prepared in acetate buffer pH 5.

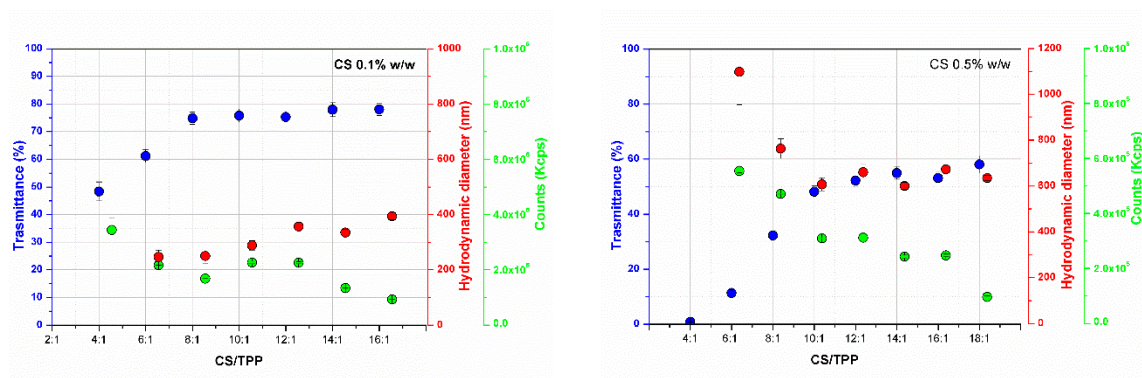

**Figure S4.** Hydrodynamic diameter (nm), counts (Kcps) and transmittance (%) of nanoparticles at different CS concentrations (0.1%, 0.5% and 1% *w/w*) and different CS/TPP ratios prepared in acetate buffer pH 5.5.

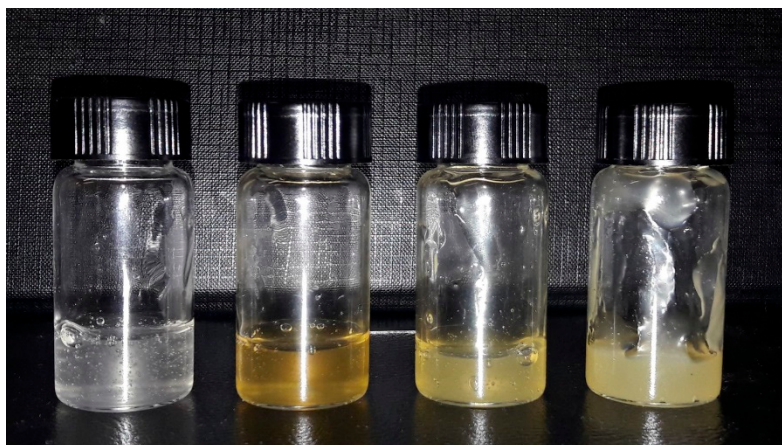

**Figure S5.** Image of the prepared HPMC/CS mixed hydrogels in 200 mM acetate buffer pH 4.5. From left to right: 5.5% HPMC (control); 5.5% HPMC/1%CS; 5.5% HPMC/1%CS NPs 12:1; 5.5% HPMC/1%CS NPs 6:1.

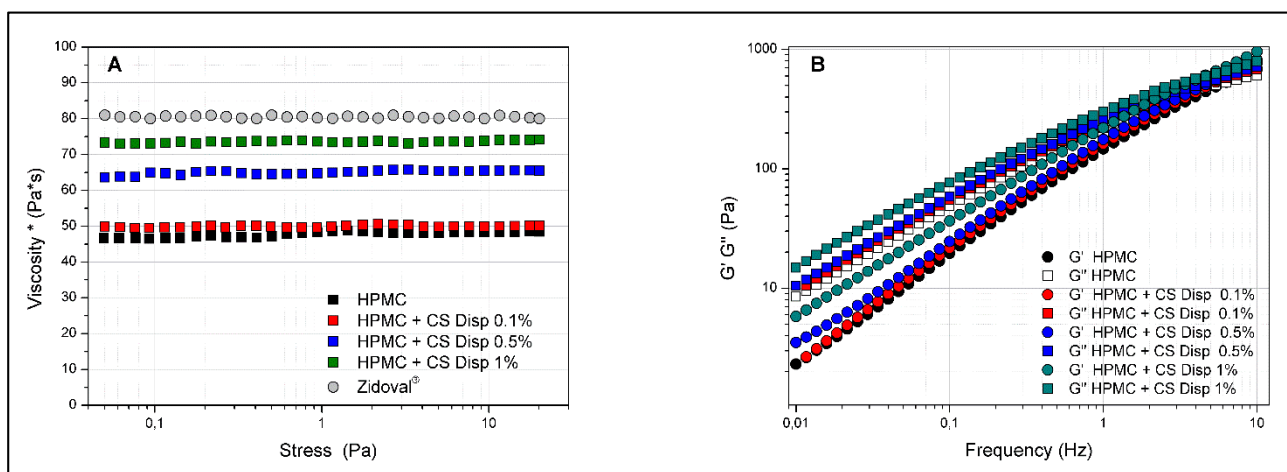

**Figure S6.** Stress sweep (A) and frequency sweep (B) results obtained from HPMC/CS mixed hydrogels at 37 °C. CS was dispersed into HPMC as a free polymer.

**Table S1.** Growth inhibition diameter (in mm) of Fluconazole (25 and 50 µg/mL) tested against the different *Candida* spp strains. Values are reported as the mean ± SD of two replicates.

| Antifungal              | Inhibition growth diameter (mm) |                              |                              |                              |                              |                              |                              |                                |
|-------------------------|---------------------------------|------------------------------|------------------------------|------------------------------|------------------------------|------------------------------|------------------------------|--------------------------------|
|                         | <i>albicans</i> strains         |                              |                              |                              | <i>non-albicans</i> strains  |                              |                              |                                |
|                         | <i>C.</i><br><i>albicans</i>    | <i>C.</i><br><i>albicans</i> | <i>C.</i><br><i>albicans</i> | <i>C.</i><br><i>albicans</i> | <i>C.</i><br><i>glabrata</i> | <i>C.</i><br><i>glabrata</i> | <i>C.</i><br><i>glabrata</i> | <i>C.</i><br><i>lusitaniae</i> |
|                         | 11/01                           | 18/01                        | 4940                         | 360923                       | 104/1                        | 104/22                       | 49/55                        | 360804                         |
| Fluconazole<br>25 µg/mL | 0                               | 0                            | 0                            | 20±1.3                       | 0                            | 0                            | 0                            | 0                              |
| Fluconazole<br>50 µg/mL | 0                               | 0                            | 0                            | 28±0.8                       | 0                            | 0                            | 0                            | 0                              |
